# Supplementary material for: Confinement and surface sites control methanol adsorbate stability on MFI zeolites, SBA-15, and a silica-supported heteropoly acid
Source: Royal Society of Chemistry journal article supplement (doi:10.1039/d1cy02330f), 2022-01-01
Supplement: d1cy02330f1.pdf [file d1cy02330f1.pdf]

**Electronic Supplementary Information**

**Confinement and Surface Sites Control Methanol  
Adsorbate Stability on MFI Zeolites, SBA-15, and Silica-  
supported Heteropoly Acid**

Zheng Li,<sup>[a]</sup> Daniel Dittmann,<sup>[a]</sup> Carolin Rieg,<sup>[a]</sup> Michael Benz,<sup>[a]</sup> and Michael Dyballa<sup>[a]\*</sup>

[a] Institute of Technical Chemistry, University of Stuttgart, Pfaffenwaldring 55, 70569  
Stuttgart, Germany

\*Corresponding author, E-mail: michael.dyballa@itc.uni-stuttgart.de

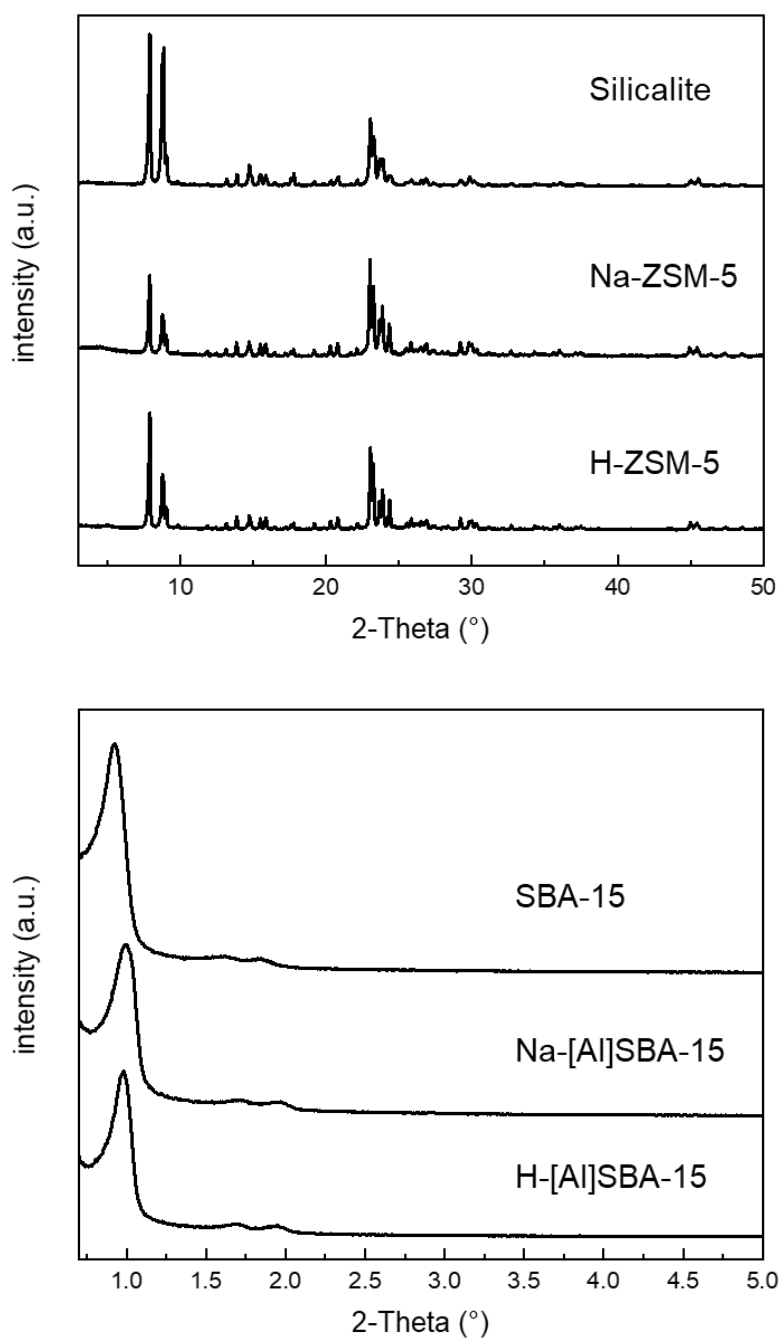

**Figure S1:** X-ray powder diffraction patterns of the microporous MFI zeolites and small angle X-ray powder diffraction patterns of the mesoporous SBA-15 materials.

**Table S1:** Data from the physicochemical characterization of the materials under study.

| Material      | Si/Al <sup>a)</sup> | Na <sup>+</sup> density<br>(mmol/g) <sup>a)</sup> | Si(OH)<br>density<br>(mmol/g) <sup>b)</sup> | BAS (H <sup>+</sup> )<br>density<br>(mmol/g) <sup>b)</sup> | BET<br>surface<br>[m <sup>2</sup> /g] | V <sub>micro</sub><br>[ml/g] | V <sub>meso</sub><br>[ml/g] | Pore<br>diameter<br>[nm] |
|---------------|---------------------|---------------------------------------------------|---------------------------------------------|------------------------------------------------------------|---------------------------------------|------------------------------|-----------------------------|--------------------------|
| Silicalite    | >800                | -                                                 | 0.66                                        | -                                                          | 350                                   | 0.12                         | 0.10                        | <0.56 <sup>d)</sup>      |
| Na-ZSM-5      | 24                  | 0.6                                               | 0.08                                        | -                                                          | 345                                   | 0.12                         | 0.06                        | <0.56 <sup>d)</sup>      |
| H-ZSM-5       | 24                  | -                                                 | 0.19                                        | 0.49                                                       | 372                                   | 0.13                         | 0.07                        | <0.56 <sup>d)</sup>      |
| SBA-15        | >1600               | -                                                 | 2.20                                        | -                                                          | 870                                   | 0.14                         | 0.93                        | 7.1 <sup>e)</sup>        |
| Na-[Al]SBA-15 | 12                  | 0.86                                              | 1.14                                        | <0.01                                                      | 522                                   | 0.05                         | 0.75                        | 6.7 <sup>e)</sup>        |
| H-[Al]SBA-15  | 12                  | -                                                 | 0.59                                        | 0.19                                                       | 442                                   | 0.03                         | 0.72                        | 6.8 <sup>e)</sup>        |
| A200          | >1600               | -                                                 | 0.39                                        | -                                                          | 198                                   | -                            | 0.76                        | -                        |
| H-STA@A200    | 12.6 <sup>c)</sup>  | -                                                 | 0.57                                        | 0.34                                                       | 120                                   | -                            | 0.49                        | -                        |
| Na-STA@A200   | 12.3 <sup>c)</sup>  | 0.25                                              | 0.52                                        | 0.09                                                       | 123                                   | -                            | 0.56                        | -                        |

a) Determined by ICP-OES with experimental accuracy of  $\pm 10\%$ .

b) Determined by <sup>1</sup>H MAS NMR (BAS after NH<sub>3</sub> adsorption).

c) Si/W ratio for STA@A200.

d) according to the IZA database (Baerlocher, C.; McCusker, L. B. Database of Zeolite Structures; <http://www.izastructure.org/databases/>)

e) Calculated from physisorption adsorption branch.

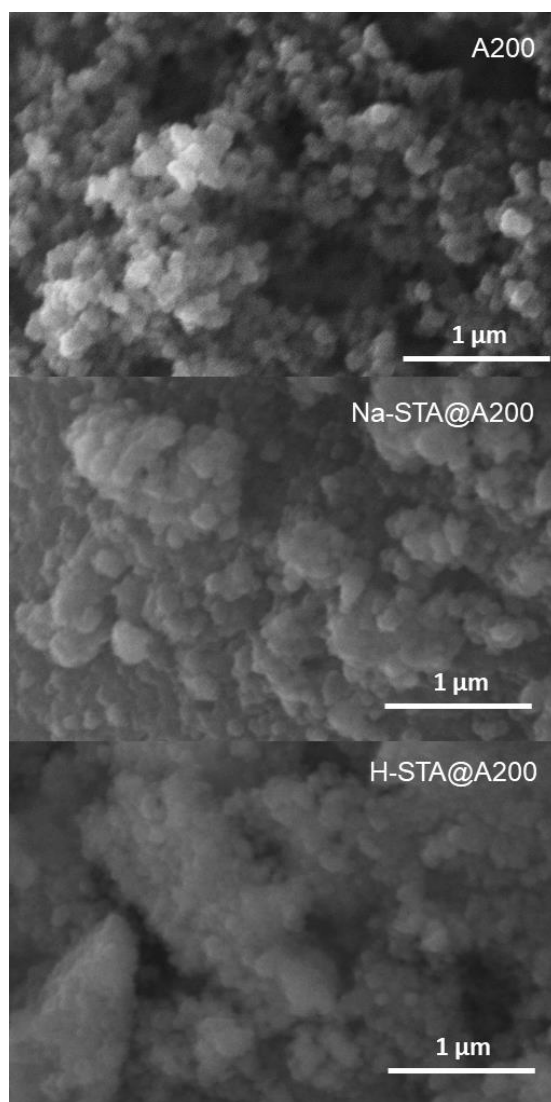

**Figure S2:** SEM pictures of A200 support and silicotungstic acid (STA) in Na- and H-form supported on A200.

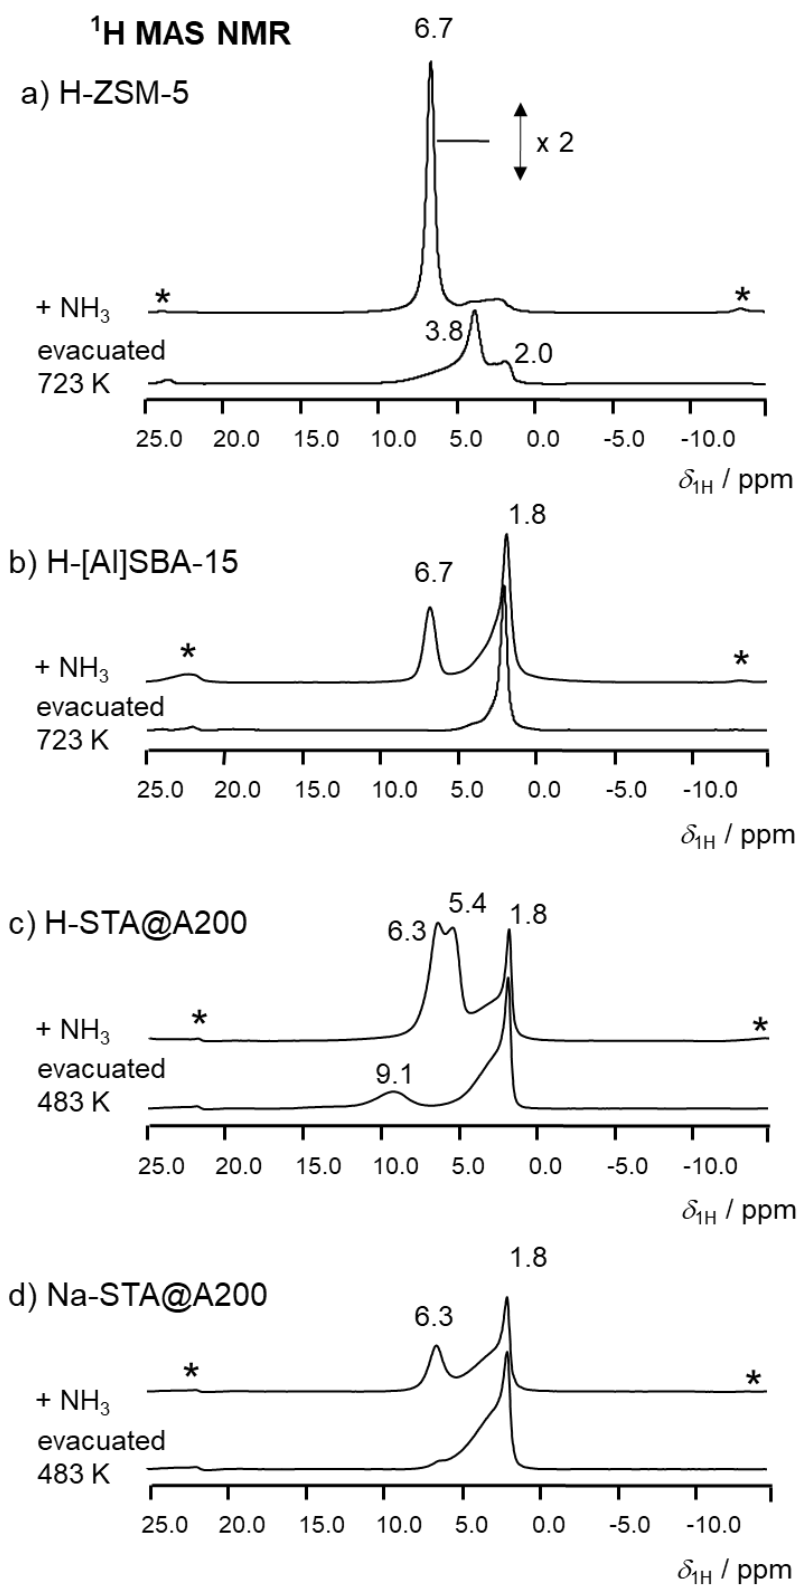

**Figure S3:** <sup>1</sup>H MAS NMR spectra of a) H-ZSM-5, b) H-[Al]SBA-15, c) H-STA@A200 and d) Na-STA@A200 after NH<sub>3</sub> loading and desorb at 453 K for 2 h (top) and in activated state (bottom).

**$^{27}\text{Al}$  MAS NMR**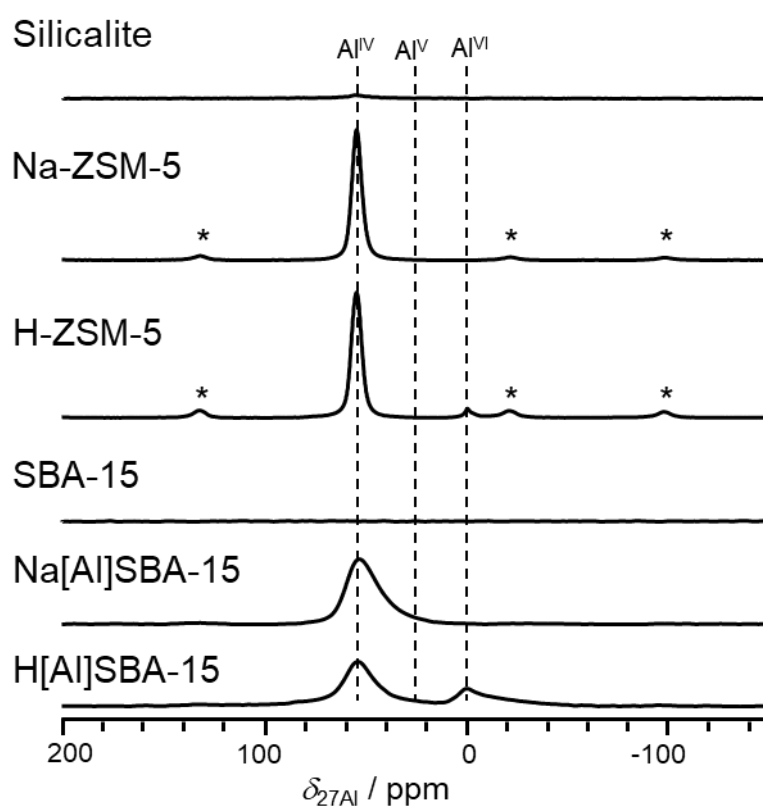

**Figure S4:**  $^{27}\text{Al}$  MAS NMR spectra of the fully hydrated materials under study. The signal assignments are those for aluminum in tetrahedral ( $\text{Al}^{\text{IV}}$ ), pentahedral ( $\text{Al}^{\text{V}}$ ), and octahedral ( $\text{Al}^{\text{VI}}$ ) oxygen coordination.

## Methanol Desorption

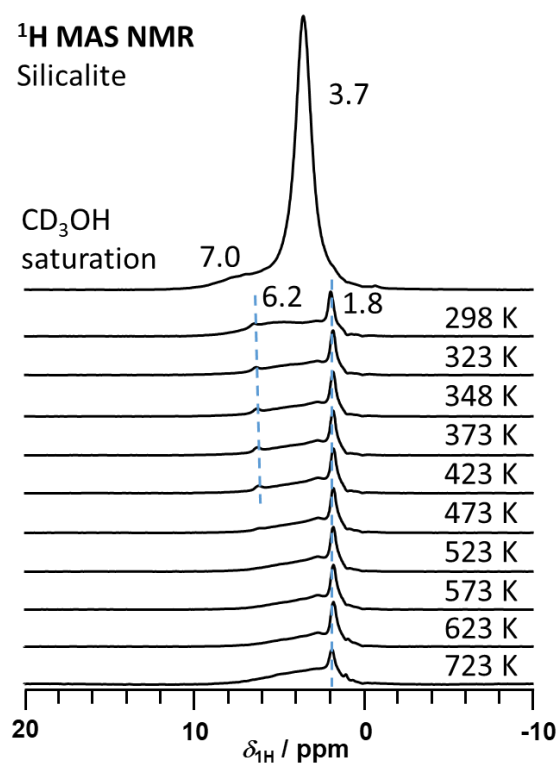

**Figure S5:** <sup>1</sup>H MAS NMR spectra of the stepwise desorption of CD<sub>3</sub>OH from Silicalite.

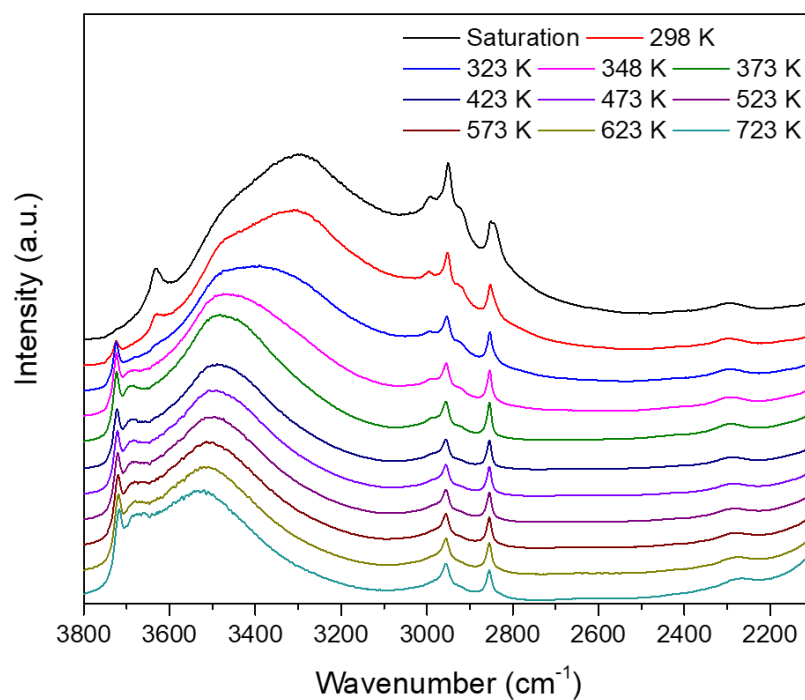

**Figure S6:** DRIFTS spectra of the stepwise desorption of CH<sub>3</sub>OH from Silicalite.

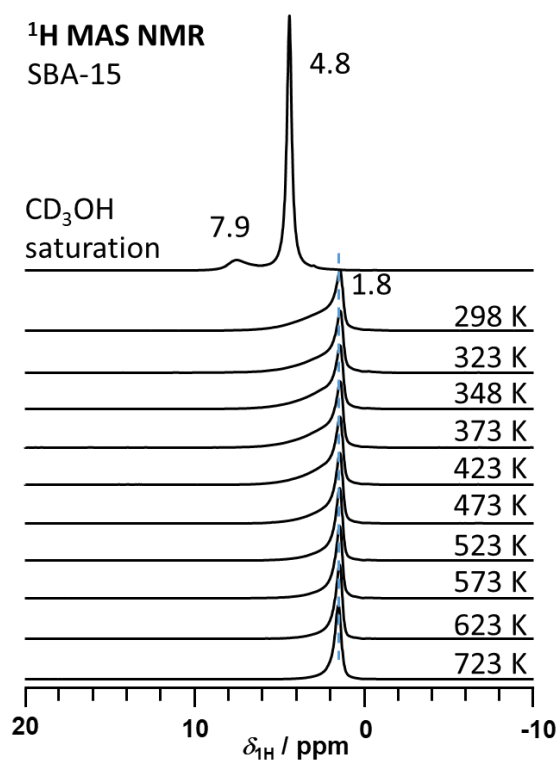

**Figure S7:** <sup>1</sup>H MAS NMR spectra of the stepwise desorption of CD<sub>3</sub>OH from SBA-15.

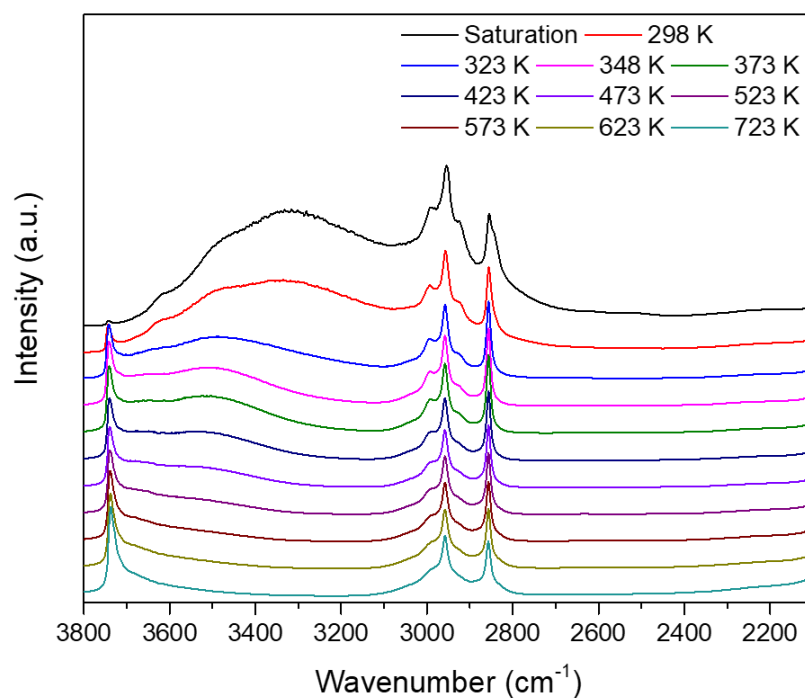

**Figure S8:** DRIFTS spectra of the stepwise desorption of CH<sub>3</sub>OH from SBA-15.



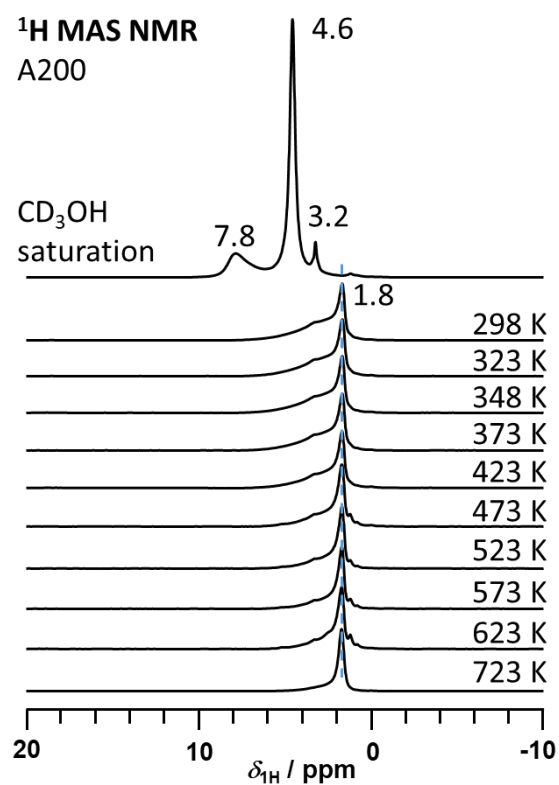

**Figure S9:** <sup>1</sup>H MAS NMR spectra of the stepwise desorption of CD<sub>3</sub>OH from A200.

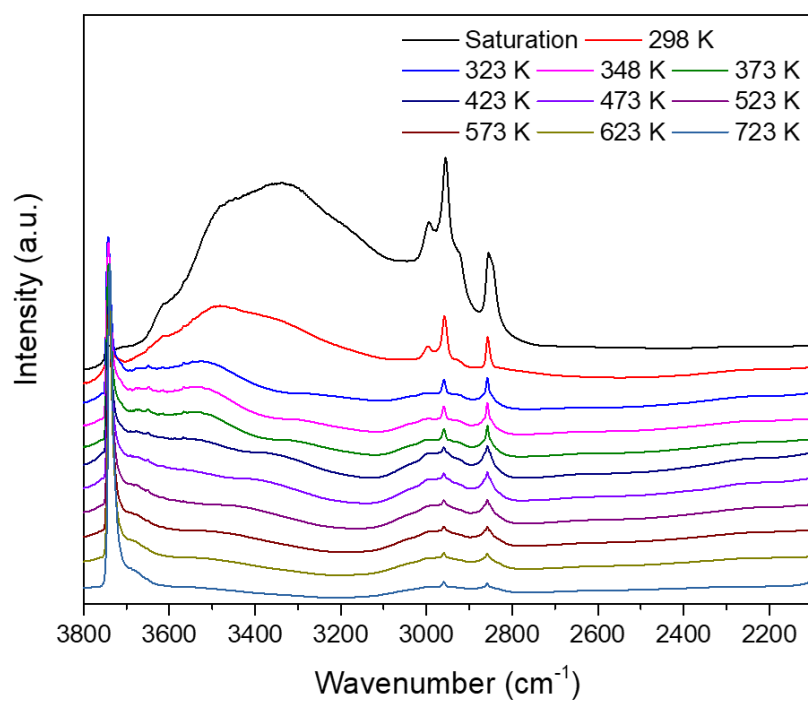

**Figure S10:** DRIFTS spectra of the stepwise desorption of CD<sub>3</sub>OH from A200

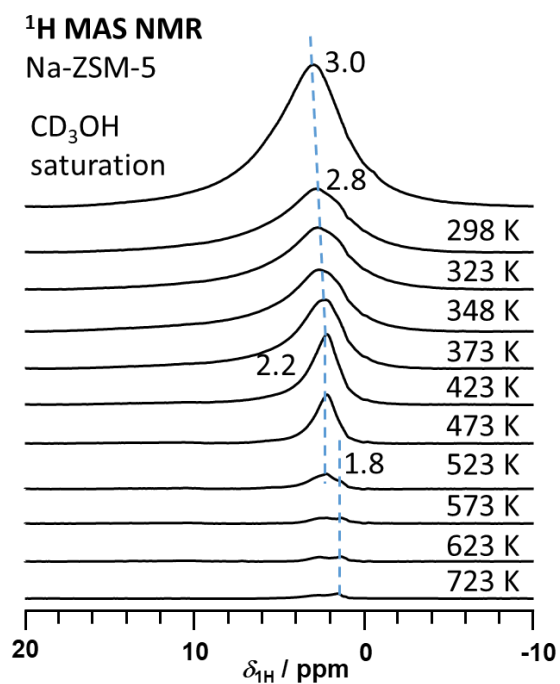

**Figure S11:** <sup>1</sup>H MAS NMR spectra of the stepwise desorption of CD<sub>3</sub>OH from Na-ZSM-5.

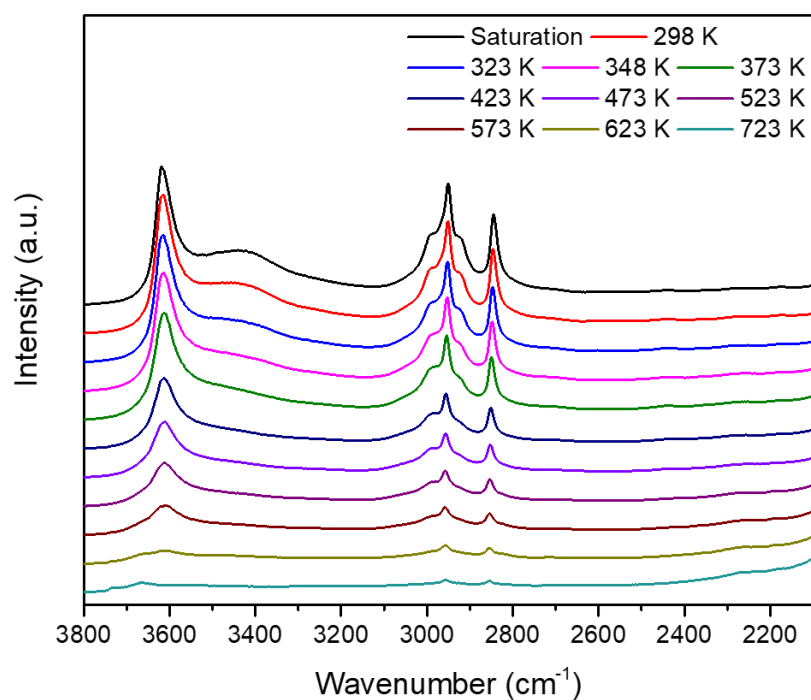

**Figure S12:** DRIFTS spectra of the stepwise desorption of CH<sub>3</sub>OH from Na-ZSM-5.

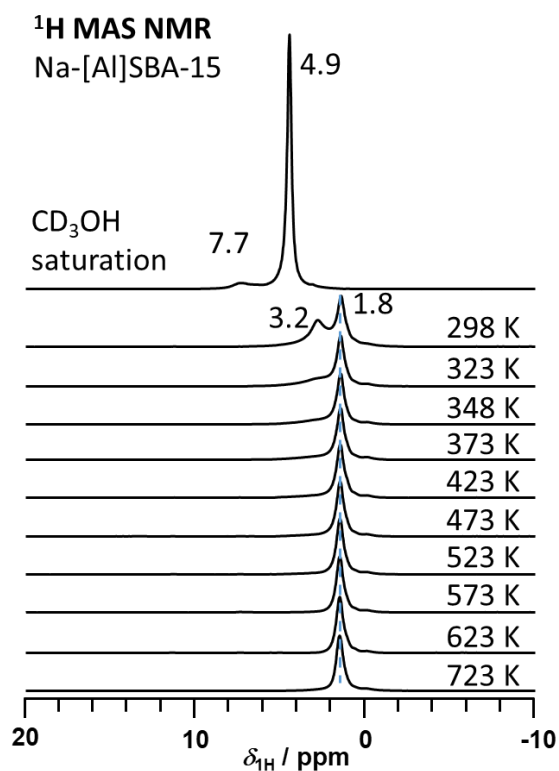

**Figure S13:** <sup>1</sup>H MAS NMR spectra of the stepwise desorption of CD<sub>3</sub>OH from Na-[Al]SBA-15.

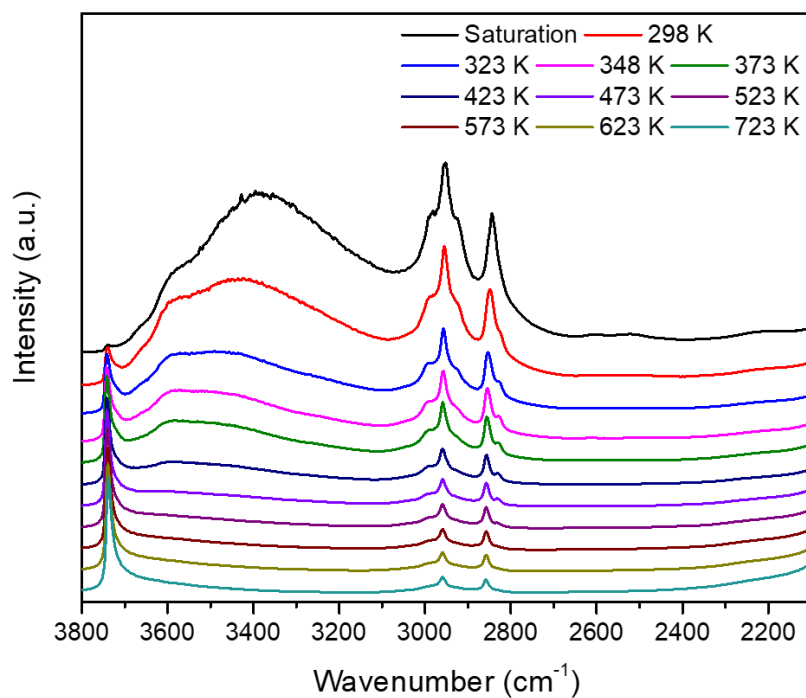

**Figure S14:** DRIFTS spectra of the stepwise desorption of CH<sub>3</sub>OH from Na-[Al]SBA-15.

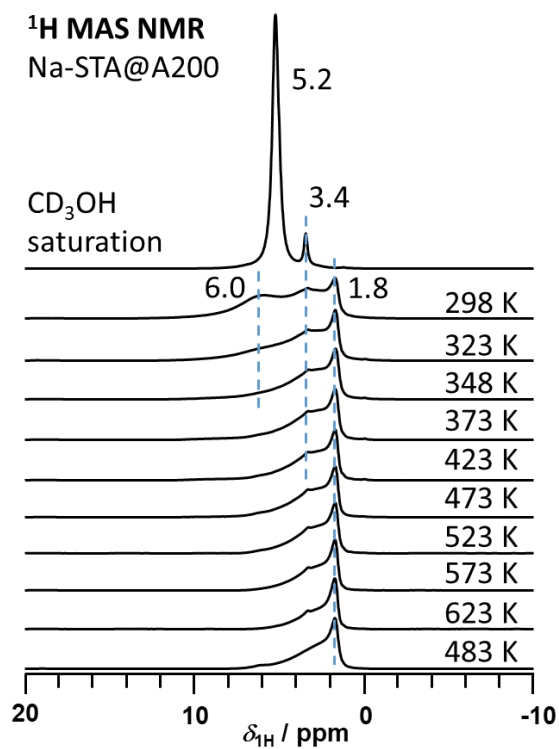

**Figure S15:** <sup>1</sup>H MAS NMR spectra of the stepwise desorption of CD<sub>3</sub>OH from Na-STA@A200.

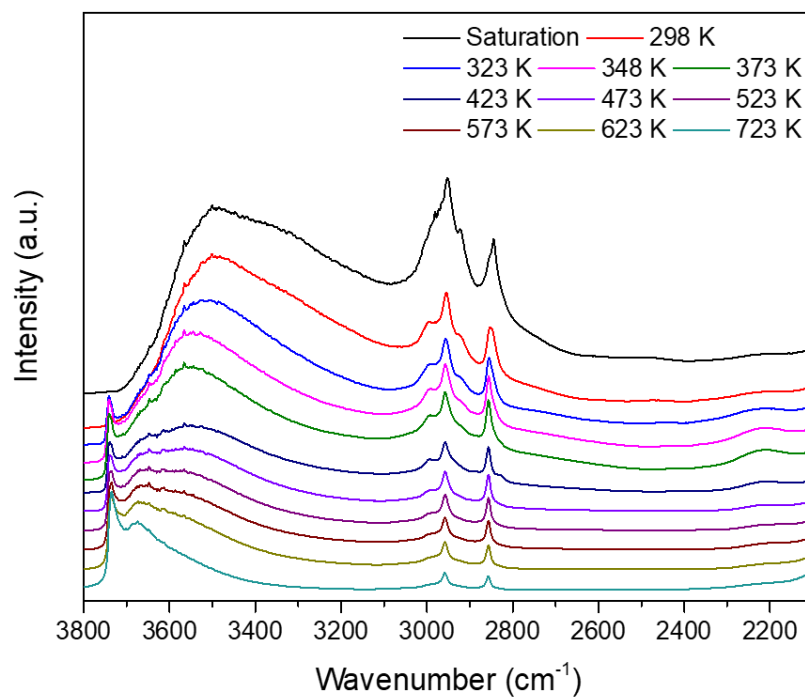

**Figure S16:** DRIFTS spectra of the stepwise desorption of CH<sub>3</sub>OH from Na-STA@A200.

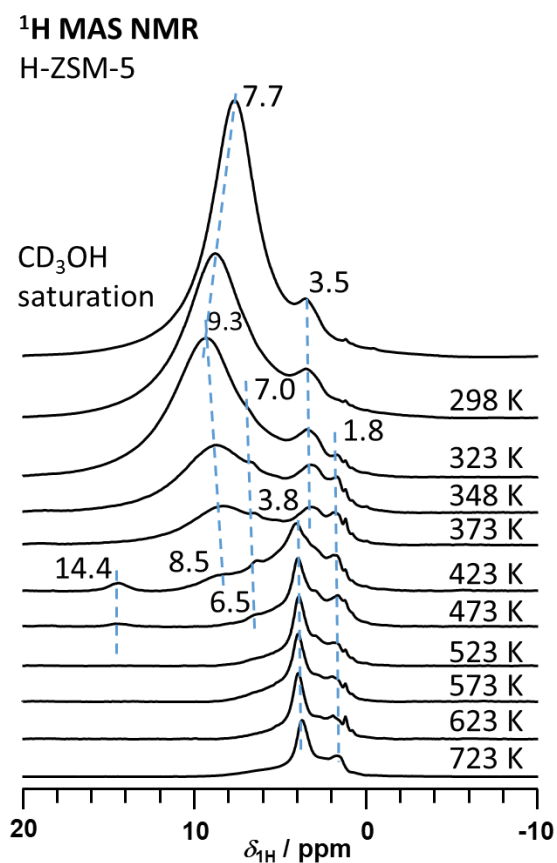

**Figure S17:**  $^1\text{H}$  MAS NMR spectra of the stepwise desorption of  $\text{CD}_3\text{OH}$  from H-ZSM-5.

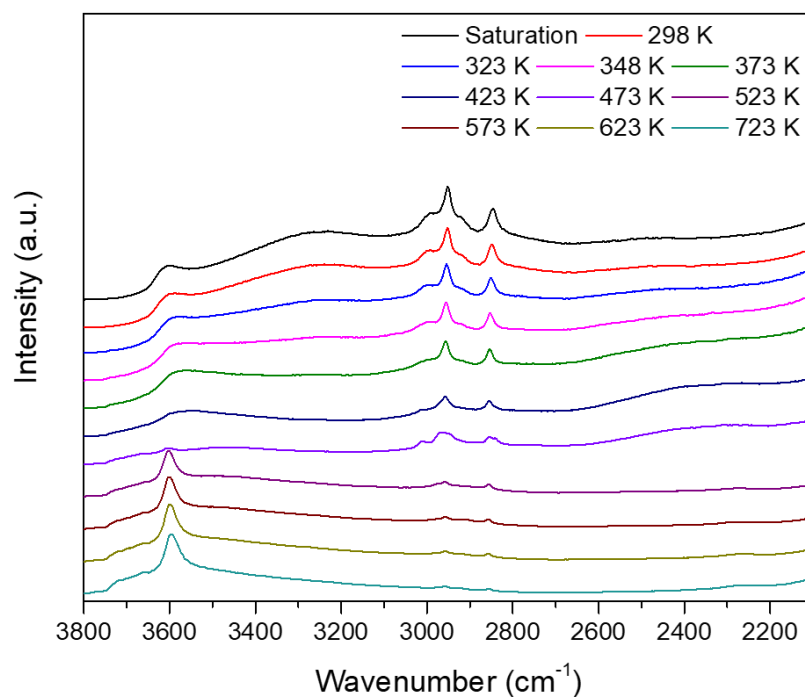

**Figure S18:** DRIFTS spectra of the stepwise desorption of  $\text{CH}_3\text{OH}$  from H-ZSM-5.

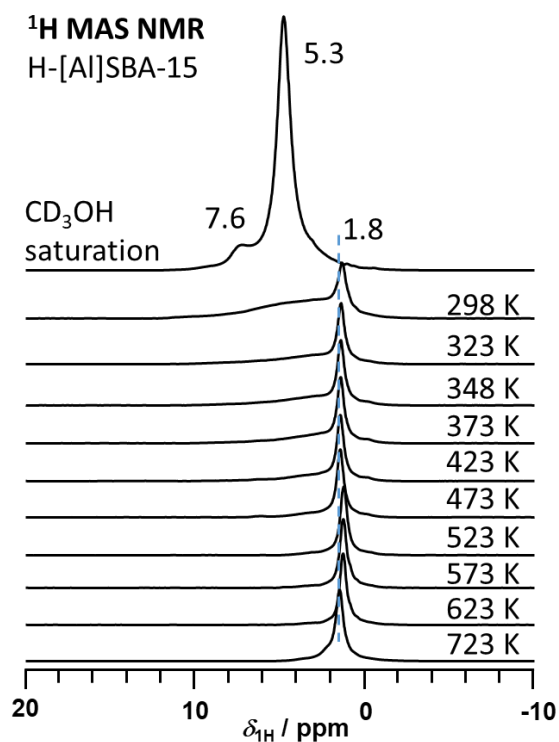

**Figure S19:** <sup>1</sup>H MAS NMR spectra of the stepwise desorption of CD<sub>3</sub>OH from H-[Al]SBA-15.

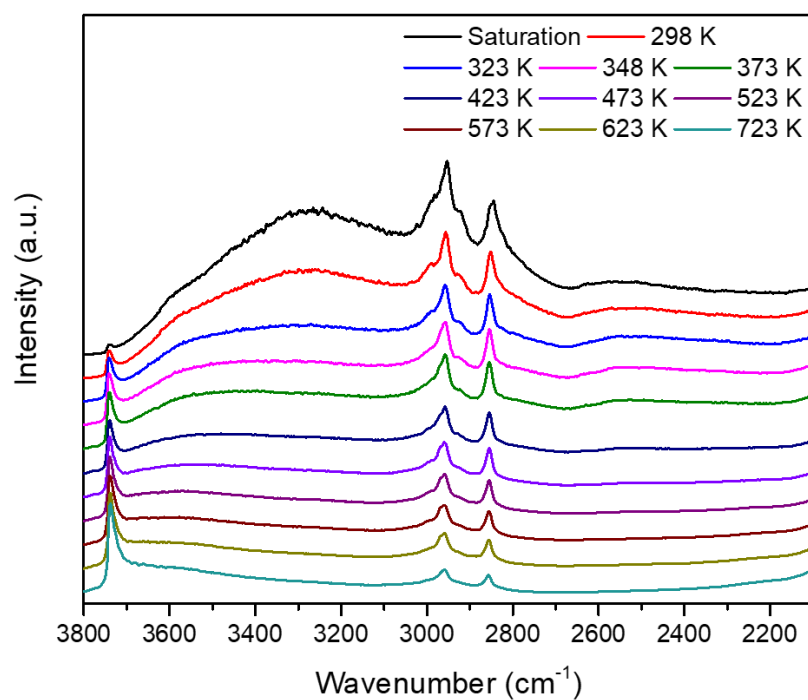

**Figure S20:** DRIFTS spectra of the stepwise desorption of CH<sub>3</sub>OH from H-[Al]SBA-15.

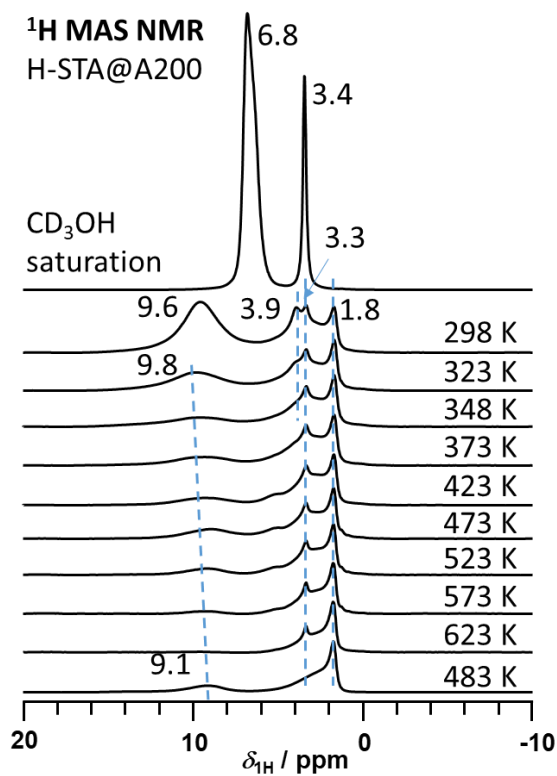

**Figure S21:** <sup>1</sup>H MAS NMR spectra of the stepwise desorption of CD<sub>3</sub>OH from H-STA@A200.

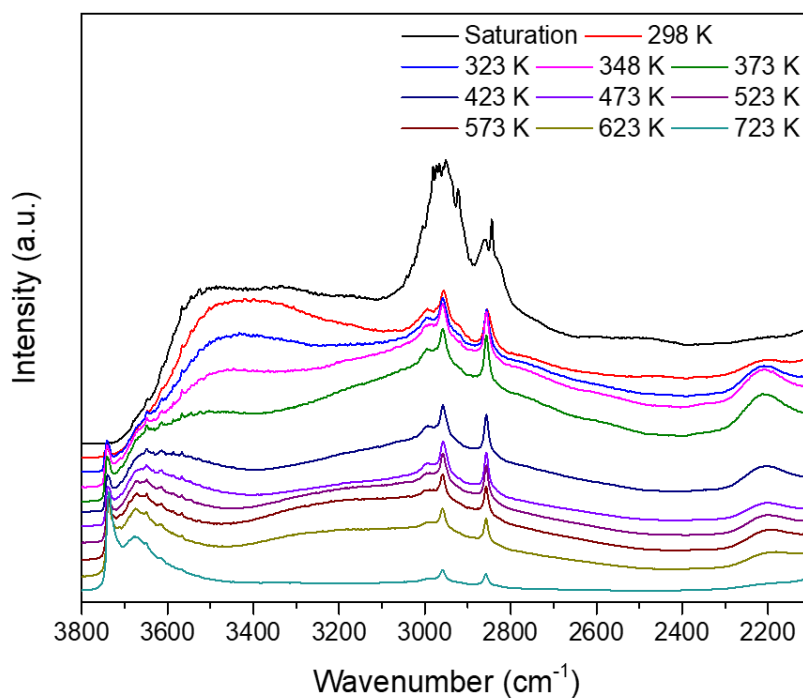

**Figure S22:** DRIFTS spectra of the stepwise desorption of CH<sub>3</sub>OH from H-STA@A200.

**Table S2:** Quantitative evaluation of  $^1\text{H}$  MAS NMR spectra during the stepwise desorption of  $\text{CD}_3\text{OH}$  from MFI zeolites.

| $\text{CD}_3\text{OH}@$ | Silicalite |                                      | Na-ZSM-5 |                                    |                                      | H-ZSM-5      |                                   |                                      |                                                 |
|-------------------------|------------|--------------------------------------|----------|------------------------------------|--------------------------------------|--------------|-----------------------------------|--------------------------------------|-------------------------------------------------|
| Temperature             | mmol/g     | $\text{CD}_3\text{OH}/\text{Si(OH)}$ | mmol/g   | $\text{CD}_3\text{OH}/\text{Na}^+$ | $\text{CD}_3\text{OH}/\text{Si(OH)}$ | mmol/g       | $\text{CD}_3\text{OH}/\text{H}^+$ | $\text{CD}_3\text{OH}/\text{Si(OH)}$ | $\text{CD}_3\text{OH}/\text{H}^+\text{+Si(OH)}$ |
| loading                 | 2.46       | 3.7                                  | 3.03     | 5.1                                | 38.9                                 | 3.63         | 7.4                               | 5.3                                  | 18.7                                            |
| 298                     | 0.10       | 0.2                                  | 1.68     | 2.8                                | 21.6                                 | 2.13         | 4.3                               | 3.1                                  | 11.0                                            |
| 323                     | 0.08       | 0.1                                  | 1.36     | 2.3                                | 17.4                                 | 1.57         | 3.2                               | 2.3                                  | 8.1                                             |
| 348                     | 0.06       | 0.1                                  | 1.09     | 1.8                                | 14.0                                 | 0.68         | 1.4                               | 1.0                                  | 3.5                                             |
| 373                     | 0.06       | 0.1                                  | 0.88     | 1.5                                | 11.3                                 | 0.41         | 0.8                               | 0.6                                  | 2.1                                             |
| 423                     | 0.04       | 0.1                                  | 0.42     | 0.7                                | 5.4                                  | 0.26(0.06)   | 0.5(0.2)                          | 0.4(0.1)                             | 1.3(0.4)                                        |
| 473                     | 0.01       | 0.0                                  | 0.18     | 0.3                                | 2.3                                  | 0.07(0.05)   | 0.2(0.1)                          | 0.1(<0.1)                            | 0.4(0.2)                                        |
| 523                     | 0.01       | 0.0                                  | 0.07     | 0.1                                | 1.0                                  | 0.03(0.02)   | 0.1(<0.1)                         | 0.1(<0.1)                            | 0.2(0.1)                                        |
| 573                     | <0.01      | 0.0                                  | 0.05     | 0.1                                | 0.6                                  | 0.02(0.01)   | 0.0(0.0)                          | 0.0(0.0)                             | 0.1(0.1)                                        |
| 623                     | <0.01      | 0.0                                  | 0.04     | 0.1                                | 0.5                                  | <0.01(<0.01) | 0.0(0.0)                          | 0.0(0.0)                             | 0.0(0.0)                                        |

Values in bracket are the quantities of DME

**Table S3:** Quantitative evaluation of  $^1\text{H}$  MAS NMR spectra during the stepwise desorption of  $\text{CD}_3\text{OH}$  from SBA-15 materials.

| $\text{CD}_3\text{OH}@$ | SBA-15 |                                      | Na-[Al]SBA-15 |                                    |                                      | H-[Al]SBA-15 |                                   |                                      |                                                 |
|-------------------------|--------|--------------------------------------|---------------|------------------------------------|--------------------------------------|--------------|-----------------------------------|--------------------------------------|-------------------------------------------------|
| Temperature             | mmol/g | $\text{CD}_3\text{OH}/\text{Si(OH)}$ | mmol/g        | $\text{CD}_3\text{OH}/\text{Na}^+$ | $\text{CD}_3\text{OH}/\text{Si(OH)}$ | mmol/g       | $\text{CD}_3\text{OH}/\text{H}^+$ | $\text{CD}_3\text{OH}/\text{Si(OH)}$ | $\text{CD}_3\text{OH}/\text{H}^+\text{+Si(OH)}$ |
| loading                 | 9.89   | 4.5                                  | 8.78          | 10.2                               | 7.7                                  | 5.18         | 27.3                              | 8.7                                  | 6.6                                             |
| 298                     | 1.08   | 0.5                                  | 0.87          | 1.0                                | 0.8                                  | 1.12         | 5.9                               | 1.9                                  | 1.4                                             |
| 323                     | 1.05   | 0.5                                  | 0.45          | 0.5                                | 0.4                                  | 0.62         | 3.3                               | 1.0                                  | 0.8                                             |
| 348                     | 1.02   | 0.5                                  | 0.27          | 0.3                                | 0.2                                  | 0.52         | 2.7                               | 0.9                                  | 0.7                                             |
| 373                     | 1.00   | 0.5                                  | 0.22          | 0.3                                | 0.2                                  | 0.45         | 2.4                               | 0.8                                  | 0.6                                             |
| 423                     | 0.91   | 0.4                                  | 0.17          | 0.2                                | 0.2                                  | 0.30         | 1.6                               | 0.5                                  | 0.4                                             |
| 473                     | 0.66   | 0.3                                  | 0.14          | 0.2                                | 0.1                                  | 0.06         | 0.3                               | 0.1                                  | 0.1                                             |
| 523                     | 0.25   | 0.1                                  | 0.12          | 0.1                                | 0.1                                  | 0.03         | 0.2                               | 0.1                                  | 0.0                                             |
| 573                     | 0.21   | 0.1                                  | <0.01         | 0.0                                | 0.0                                  | <0.01        | 0.0                               | 0.0                                  | 0.0                                             |
| 623                     | <0.01  | 0.0                                  | <0.01         | 0.0                                | 0.0                                  | <0.01        | 0.0                               | 0.0                                  | 0.0                                             |

**Table S4:** Quantitative evaluation of  $^1\text{H}$  MAS NMR spectra during the stepwise desorption of  $\text{CD}_3\text{OH}$  from STA materials.

| $\text{CD}_3\text{OH}@$ | A200   |                                      | Na-STA@A200 |                                    |                                      | H-STA@A200 |                                   |                                      |                                                 |
|-------------------------|--------|--------------------------------------|-------------|------------------------------------|--------------------------------------|------------|-----------------------------------|--------------------------------------|-------------------------------------------------|
| Temperature             | mmol/g | $\text{CD}_3\text{OH}/\text{Si(OH)}$ | mmol/g      | $\text{CD}_3\text{OH}/\text{Na}^+$ | $\text{CD}_3\text{OH}/\text{Si(OH)}$ | mmol/g     | $\text{CD}_3\text{OH}/\text{H}^+$ | $\text{CD}_3\text{OH}/\text{Si(OH)}$ | $\text{CD}_3\text{OH}/\text{H}^+\text{+Si(OH)}$ |
| loading                 | 2.76   | 7.1                                  | 3.60        | 14.4                               | 5.9                                  | 5.29       | 15.6                              | 9.3                                  | 5.8                                             |
| 298                     | 0.48   | 1.2                                  | 0.40        | 1.6                                | 0.7                                  | 0.75       | 2.2                               | 1.3                                  | 0.8                                             |
| 323                     | 0.30   | 0.8                                  | 0.28        | 1.1                                | 0.5                                  | 0.27       | 0.8                               | 0.5                                  | 0.3                                             |
| 348                     | 0.29   | 0.8                                  | 0.12        | 0.5                                | 0.2                                  | 0.09       | 0.3                               | 0.2                                  | 0.1                                             |
| 373                     | 0.28   | 0.7                                  | 0.09        | 0.4                                | 0.2                                  | 0.06       | 0.2                               | 0.1                                  | 0.1                                             |
| 423                     | 0.22   | 0.6                                  | 0.08        | 0.3                                | 0.1                                  | 0.01       | 0.0                               | 0.0                                  | 0.0                                             |
| 473                     | 0.12   | 0.3                                  | 0.05        | 0.2                                | 0.1                                  | <0.01      | 0.0                               | 0.0                                  | 0.0                                             |
| 523                     | 0.10   | 0.3                                  | <0.01       | 0.0                                | 0.0                                  | <0.01      | 0.0                               | 0.0                                  | 0.0                                             |
| 573                     | 0.09   | 0.2                                  | <0.01       | 0.0                                | 0.0                                  | <0.01      | 0.0                               | 0.0                                  | 0.0                                             |
| 623                     | 0.06   | 0.2                                  | <0.01       | 0.0                                | 0.0                                  | <0.01      | 0.0                               | 0.0                                  | 0.0                                             |



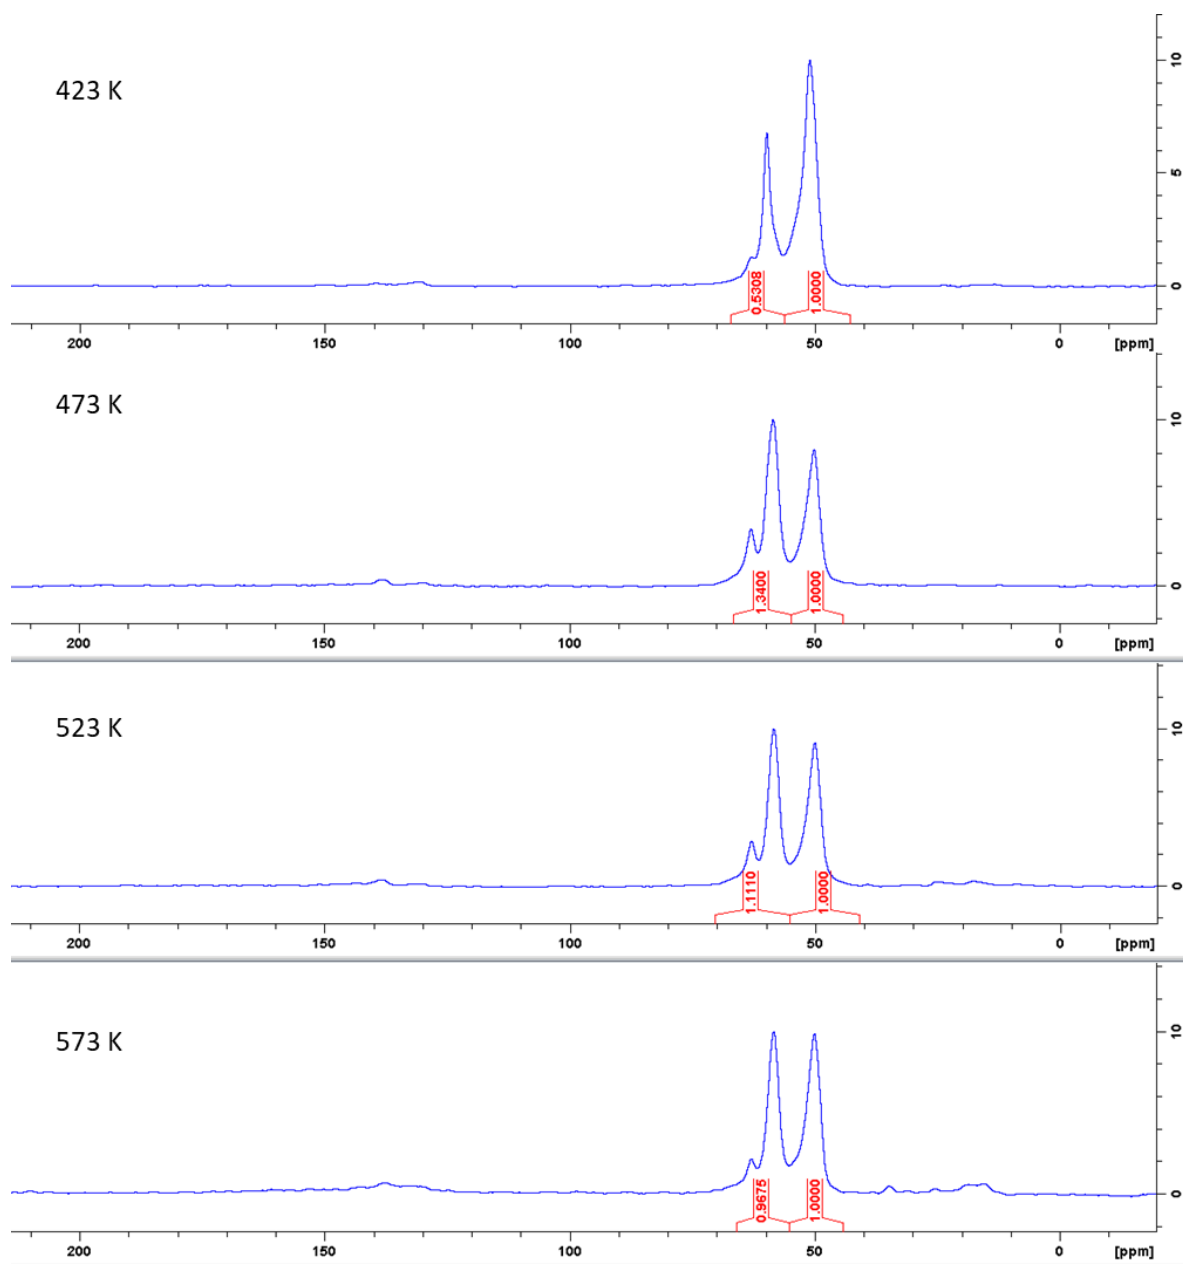

**Figure S23:**  $^{13}\text{C}$  CP MAS NMR spectra of the stepwise desorption of  $\text{CD}_3\text{OH}$  from H-ZSM-5 in the temperature range from 423 K to 573 K to estimate the ratio between methanol and DME. Note that direct excitation measurements and CP measurements are in reasonable agreement (with error <10%).

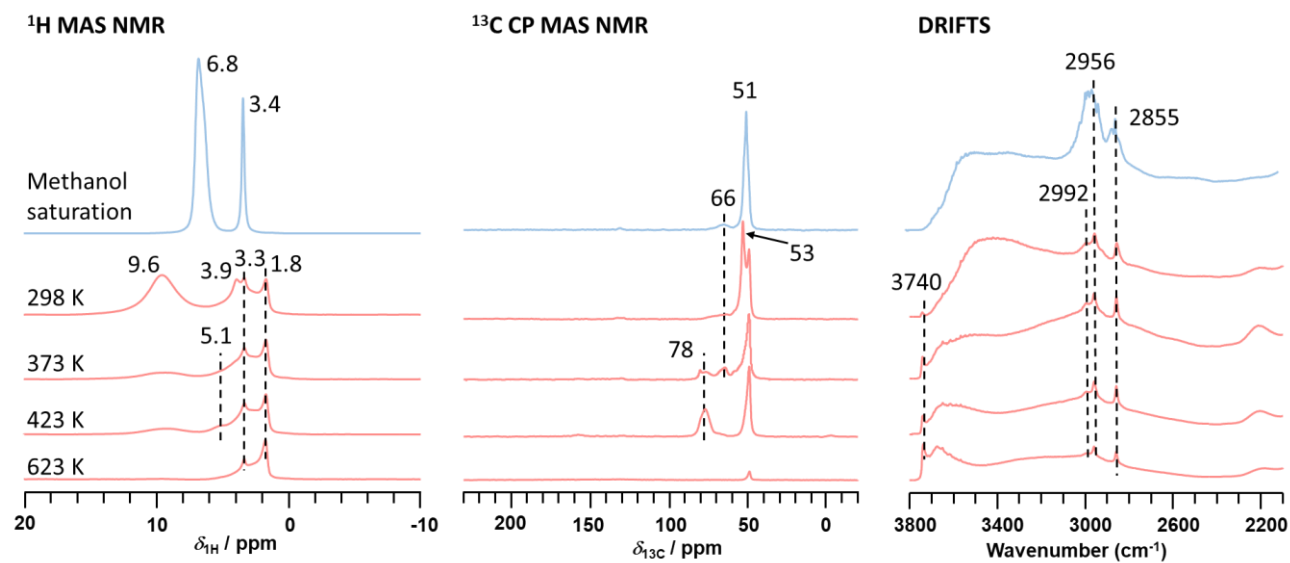

**Figure S24:** <sup>1</sup>H and <sup>13</sup>C MAS NMR and DRIFTS spectra of stepwise desorption of CD<sub>3</sub>OH from H-STA@A200 at chosen temperatures.
